# Supplementary material for: Identification of a novel strong promoter from the anhydrobiotic midge, Polypedilum vanderplanki, with conserved function in various insect cell lines
Source: PubMed Central journal article supplement (PMC6504868; doi:10.1038/s41598-019-43441-x), 2019-05-07
Supplement: 41598_2019_43441_MOESM1_ESM.pdf [file 41598_2019_43441_MOESM1_ESM.pdf]

# **Identification of a novel strong promoter from the anhydrobiotic midge, *Polypedilum vanderplanki*, with conserved function in various insect cell lines**

Yugo Miyata<sup>1,2,\$</sup>, Shoko Tokumoto<sup>3,\$</sup>, Yoichiro Sogame<sup>4,\$</sup>, Ruslan Deviatiiarov<sup>5</sup>, Jun Okada<sup>2</sup>, Richard Cornette<sup>2</sup>, Oleg Gusev<sup>5,6,7</sup>, Elena Shagimardanova<sup>5</sup>, Minoru Sakurai<sup>1</sup>, Takahiro Kikawada<sup>2,3,\*</sup>

<sup>1</sup>Center for Biological Resources and Informatics, Tokyo Institute of Technology, Yokohama, Japan

<sup>2</sup>Anhydrobiosis Research Group, Molecular Biomimetics Research Unit, Institute of Agrobiological Sciences, National Institute of Agriculture and Food Research Organization (NARO), Tsukuba, Japan

<sup>3</sup>Department of Integrated Biosciences, Graduate School of Frontier Sciences, The University of Tokyo, Kashiwa, Japan

<sup>4</sup>Department of Applied Chemistry and Biochemistry, National Institute of Technology, Fukushima College, Iwaki, Japan

<sup>5</sup>Institute of Fundamental Medicine and Biology, Kazan Federal University, Kazan, Russian Federation

<sup>6</sup>RIKEN-KFU Translational Genomics Unit, RIKEN Cluster for Science, Technology and Innovation Hub, RIKEN, Yokohama, Japan

<sup>7</sup>Preventive Medicine and Diagnosis Innovation Program, RIKEN Cluster for Science, Technology and Innovation Hub, RIKEN, Yokohama, Japan

<sup>\$</sup>These authors contributed equally to this study.

*\*Corresponding author:*

Takahiro Kikawada, PhD

Anhydrobiosis Research Group, Molecular Biomimetics Research Unit, Institute of Agrobiological Sciences, National Institute of Agriculture and Food Research Organization, Ohwashi 1-2, Tsukuba, 305-8634, Japan

Tel: +81 298386170, Fax: +81 298386170

Email: kikawada@affrc.go.jp

**a**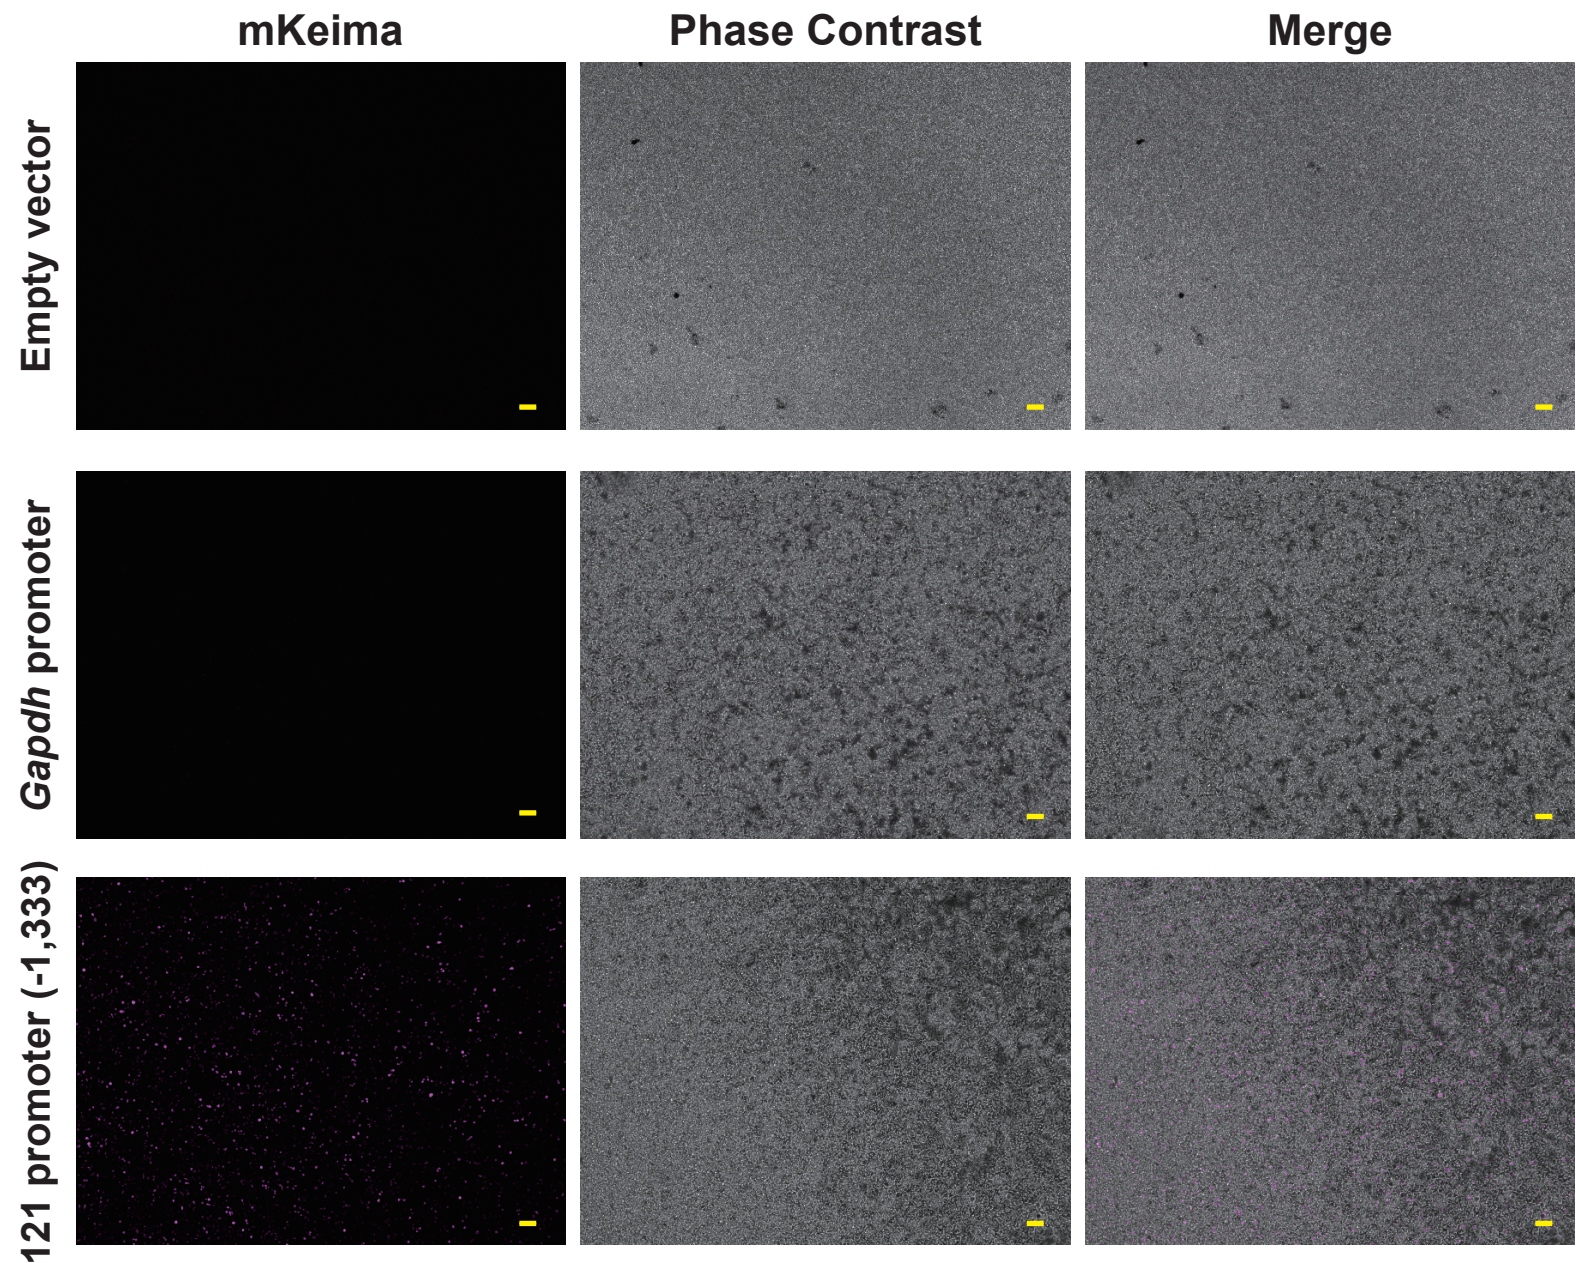**b**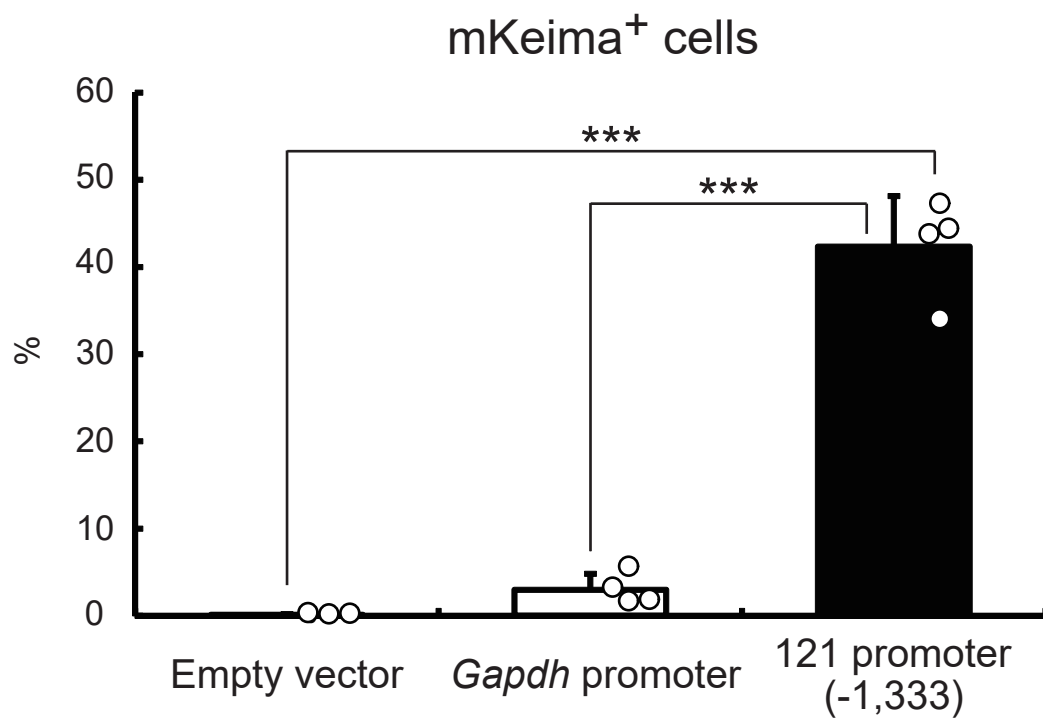

## Figure S1

Comparison of the promoter activities of the *PvGapdh* and 121 promoters.

The *PvGapdh* and 121 promoters were ligated to the mKeima gene, and the plasmid vectors were transfected into Pv11 cells. Images were acquired three days after transfection using a BZ-X700 fluorescence microscope. Merged images are shown on the right (a). The proportions of mKeima<sup>+</sup> cells in the live cell population (%) were analyzed using a CytoFLEX S flow cytometer (b). Scale bars, 50  $\mu$ m. The values are expressed as mean  $\pm$  SD. \*\*\*  $p < 0.001$ ; n=3-4 in each group.

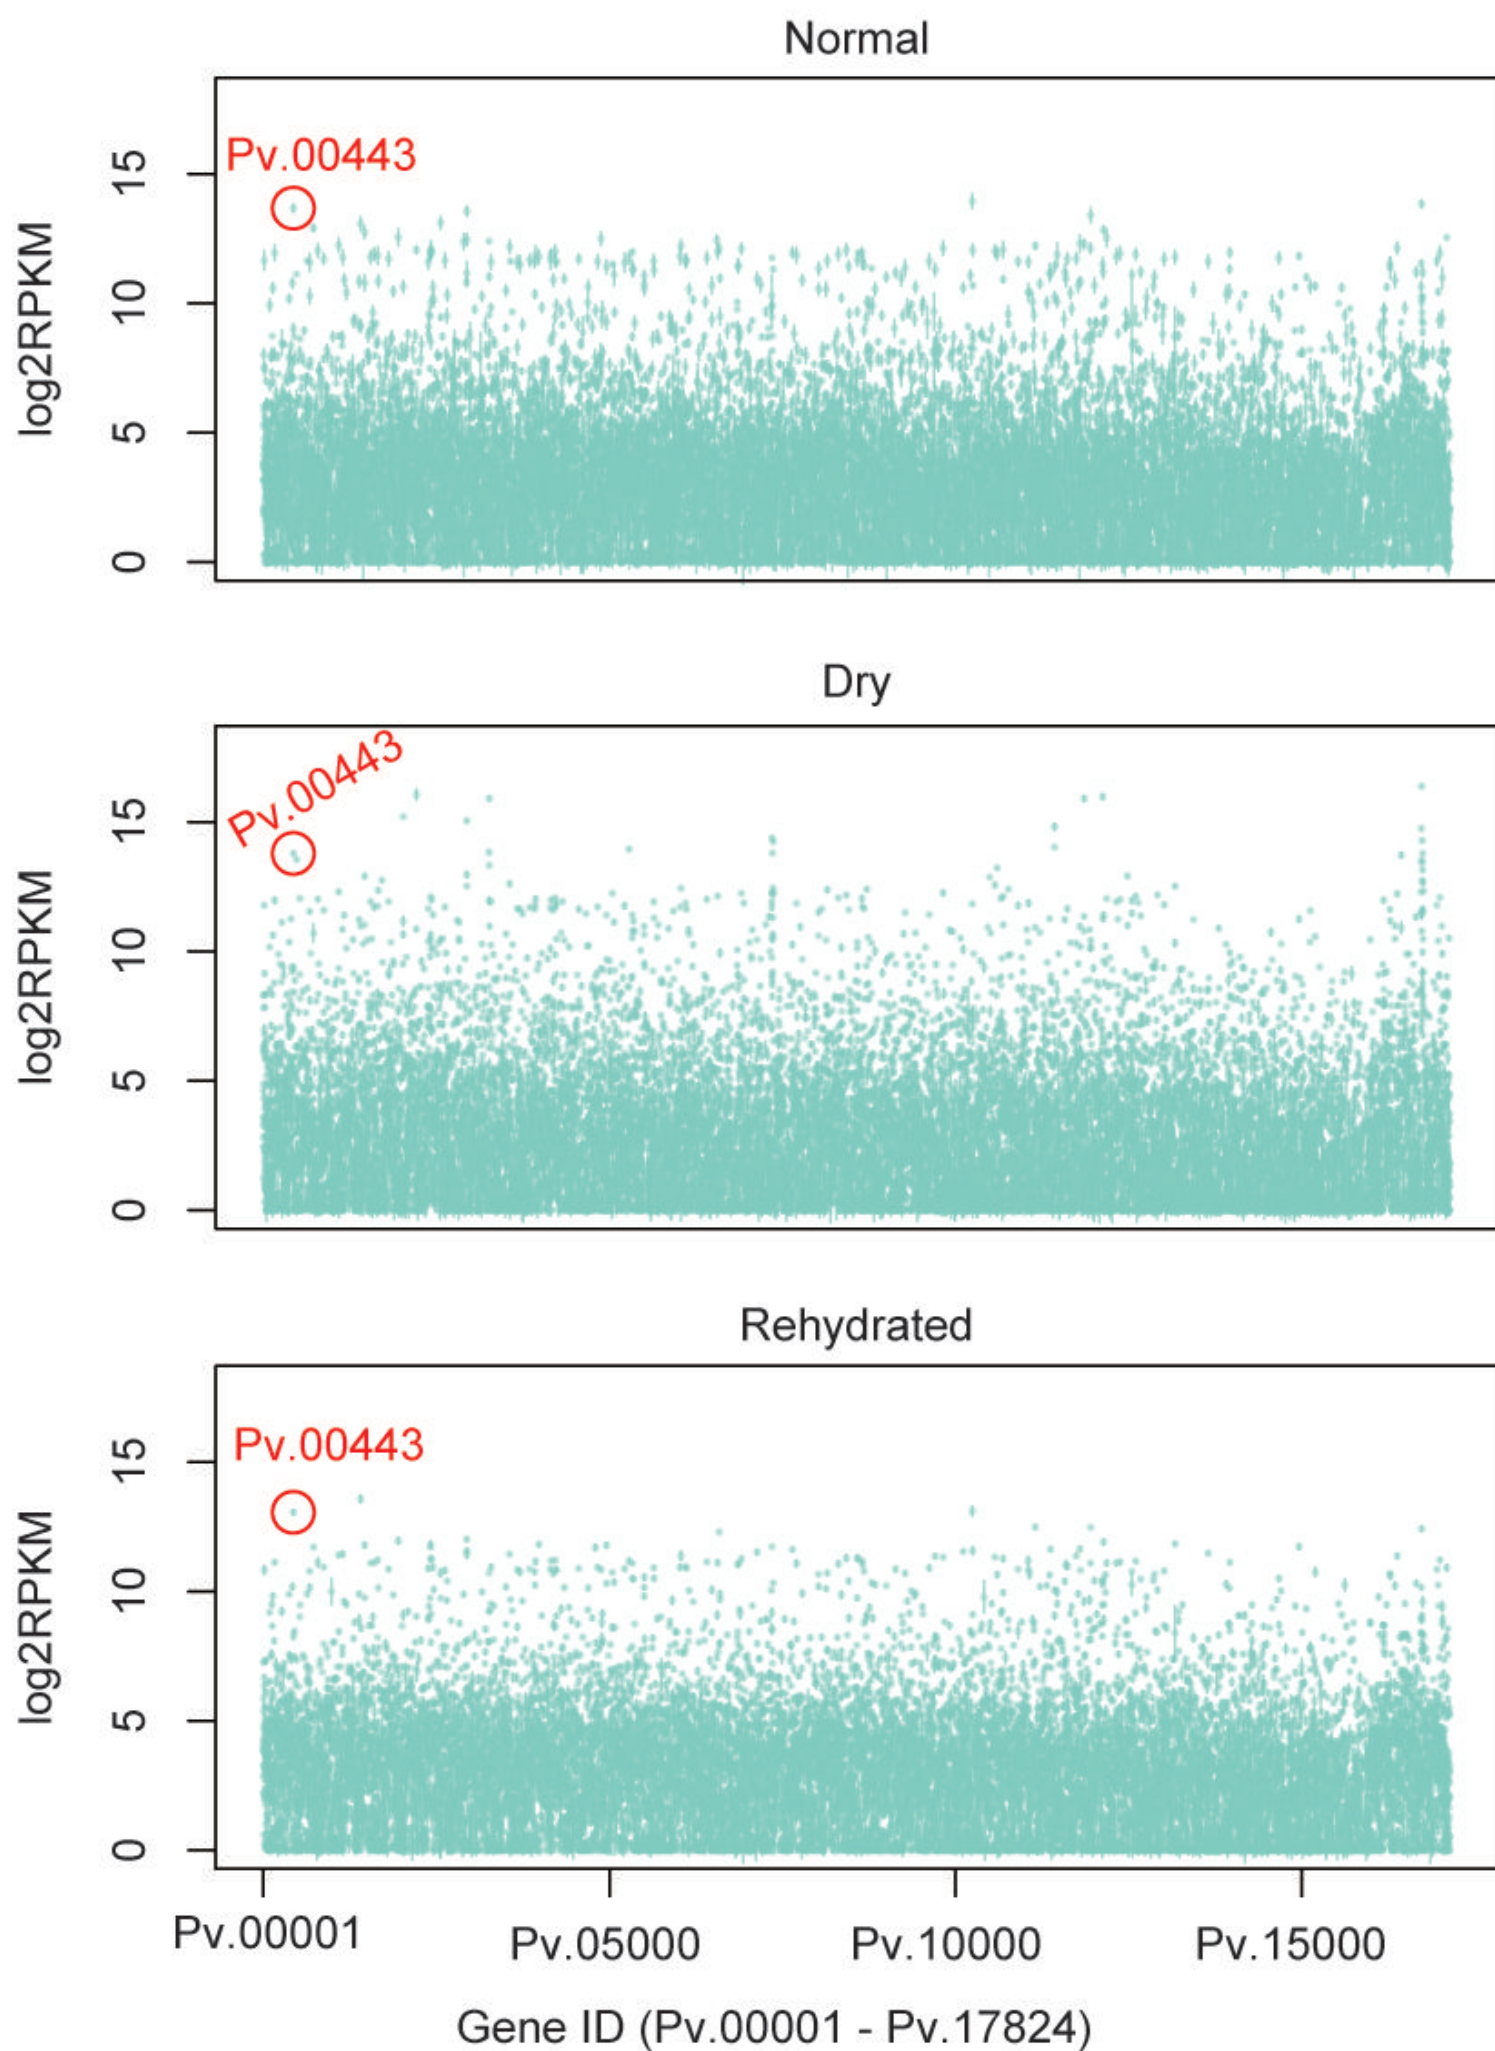

## Figure S2

Global search for constitutively highly expressed genes in *P. vanderplanki* larvae.

Expression levels (log<sub>2</sub>RPKM) of all *P. vanderplanki* genes from MidgeBase (<http://bertone.nises-f.affrc.go.jp/midgebase/>) are shown. The *Pv.00443* gene is consistently highly expressed during normal, dry and rehydrated conditions. “Dry” means 48 h after desiccation and “Rehydrated” means 24 h after rehydration.

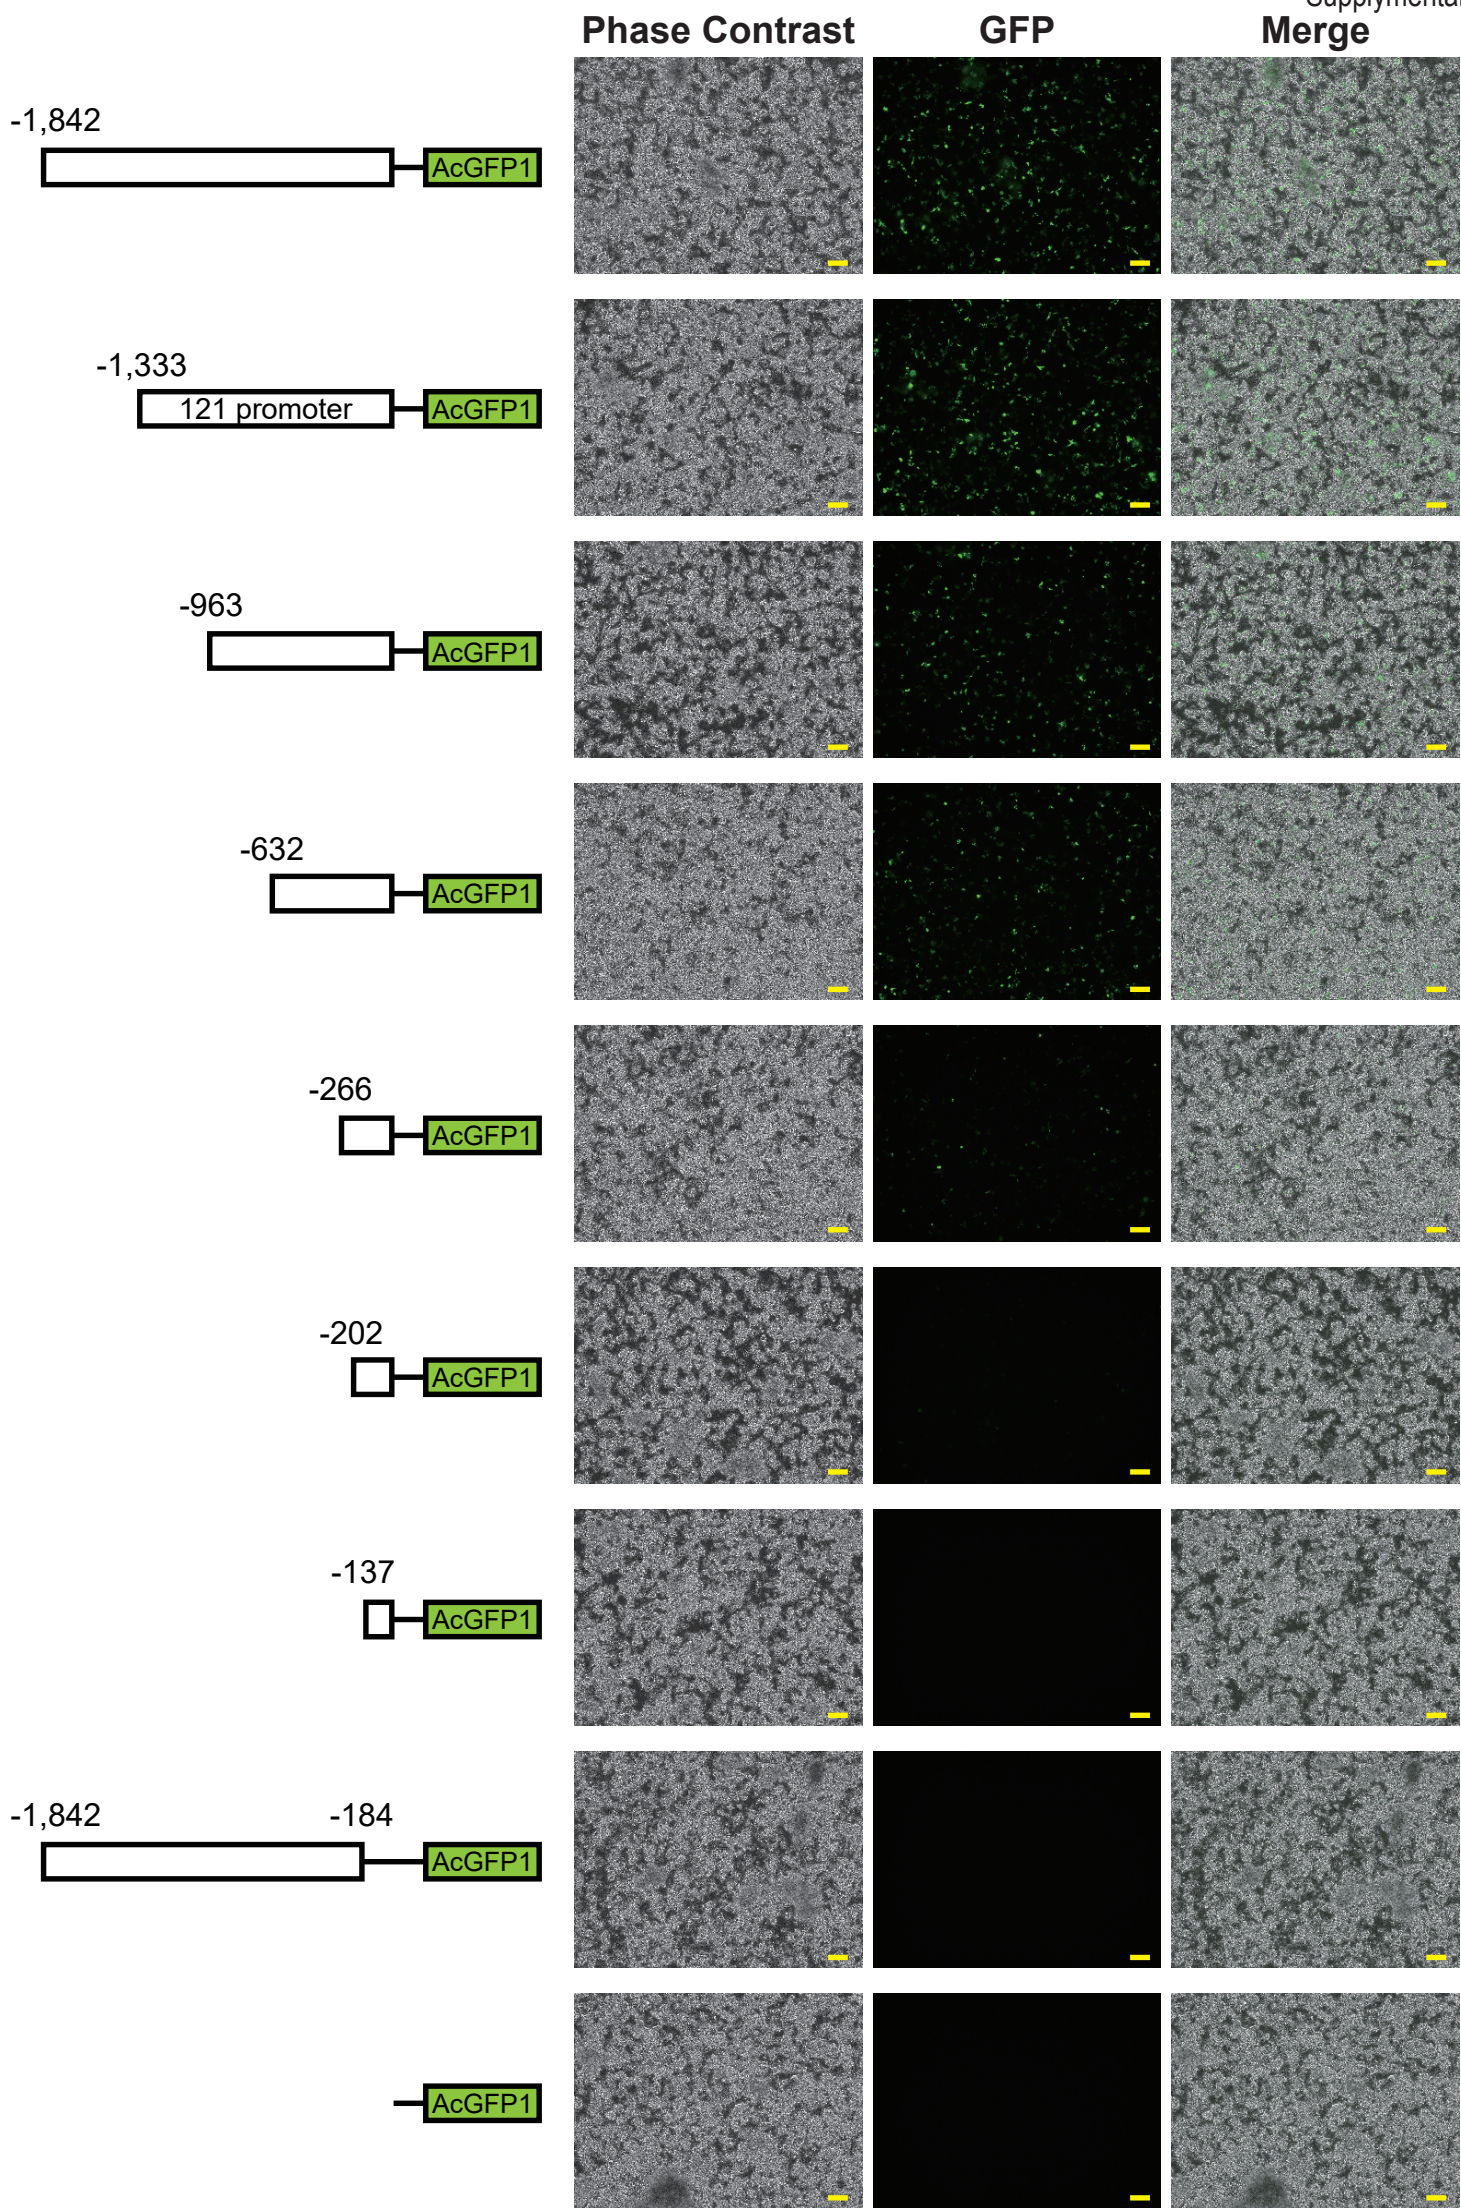

### **Figure S3**

AcGFP1 expression under the control of deletion mutants of the 121 promoter.

The constructs for AcGFP1 gene expression under the control of a series of deletion mutants of the 121 promoter are shown on the left. Images were obtained three days after transfection and show phase contrast (left) and GFP fluorescence (middle). The merged images are shown on the right. Scale bars, 100  $\mu\text{m}$ .

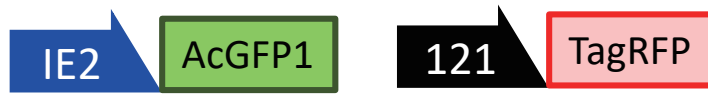

Phase Contrast

GFP

RFP

Merge

S2

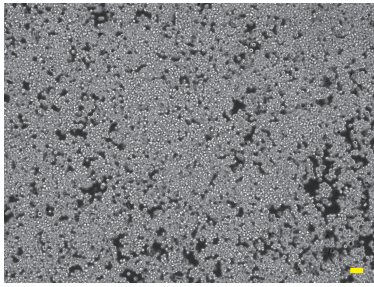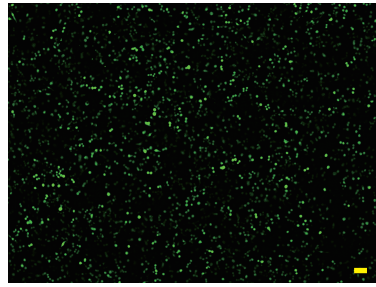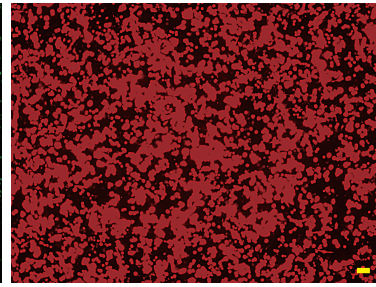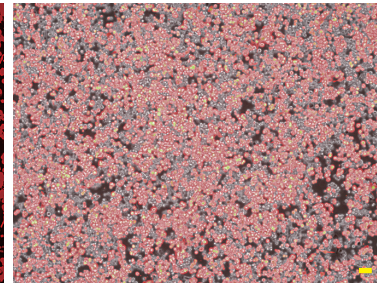

SaPe-4

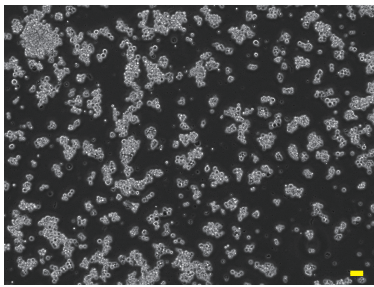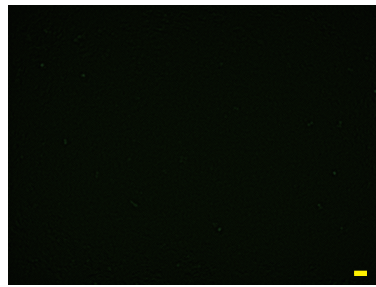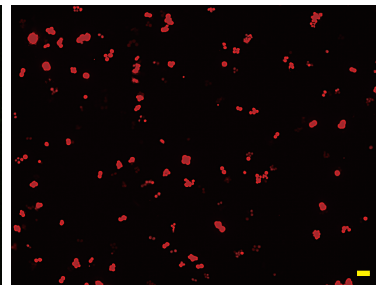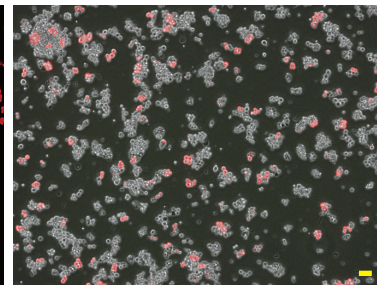

AeAI-2

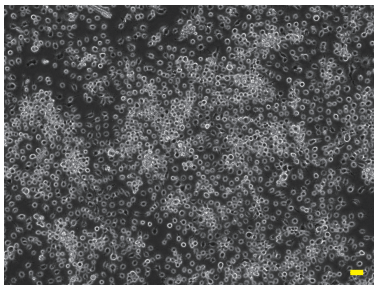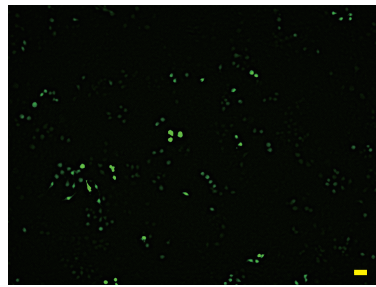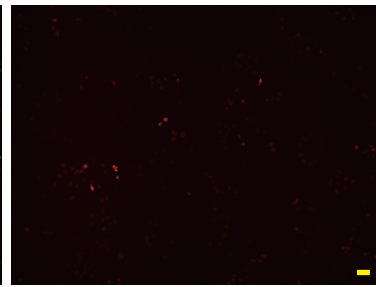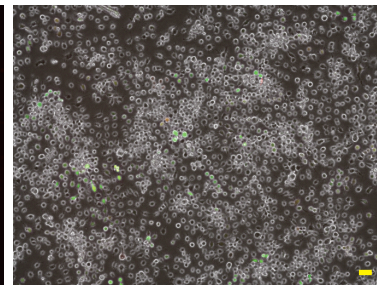

Sf9

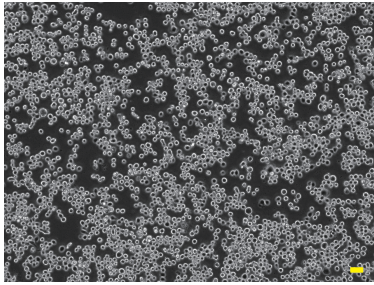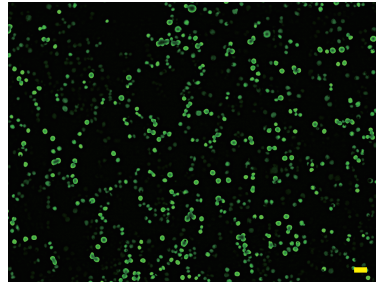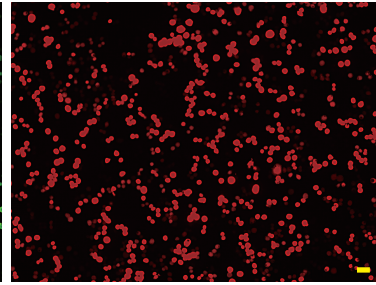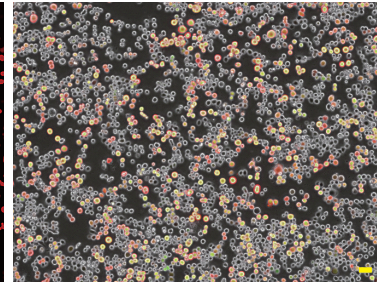

BmN4

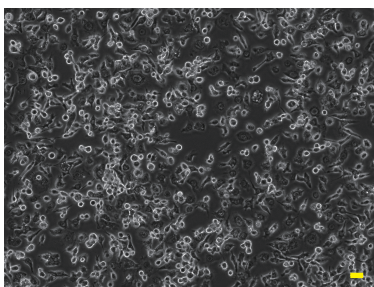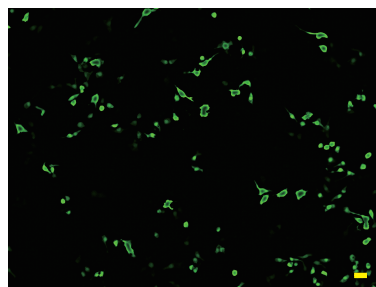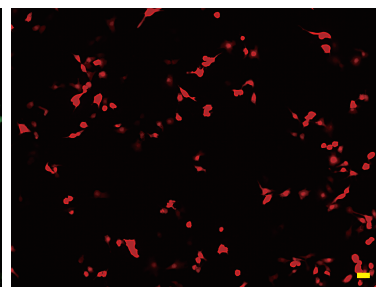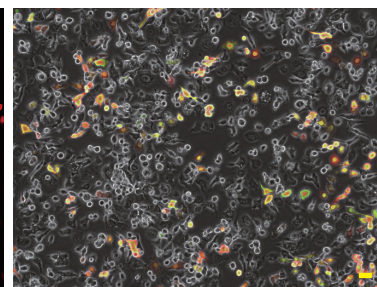

Tc81

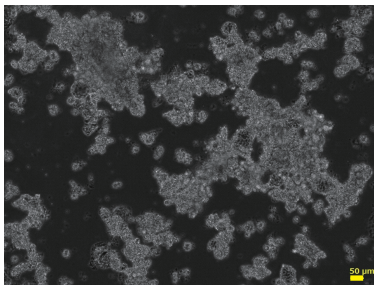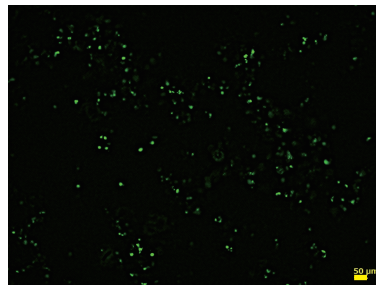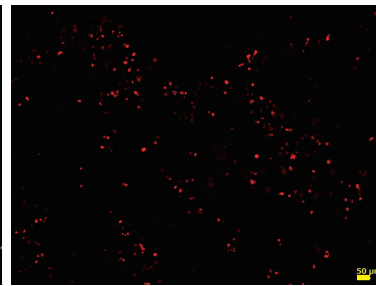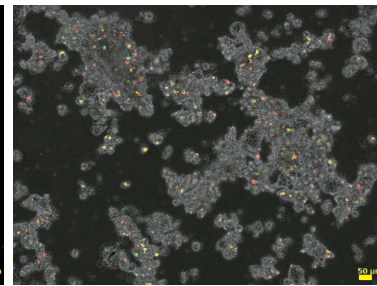

50 μm

50 μm

50 μm

50 μm



#### **Figure S4**

Comparison of OpIE2 and 121 promoter activities in various insect cell lines.

The OpIE2 and 121 promoters were ligated to the AcGFP1 and TagRFP genes, respectively, and the plasmid vectors were transfected into various insect cell lines as indicated on the left. The images were acquired three days after transfection, and the merged images are shown on the right. Scale bars, 50  $\mu\text{m}$ .



**Figure S5**

Magnified images of Figure 4b. Scale bars, 100  $\mu\text{m}$ .

Zeocin (-)

121-IE2

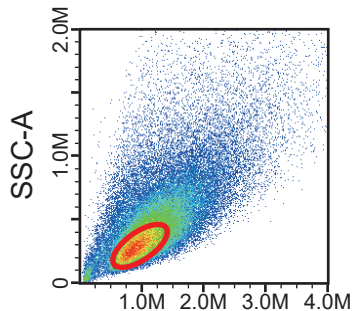

Main population

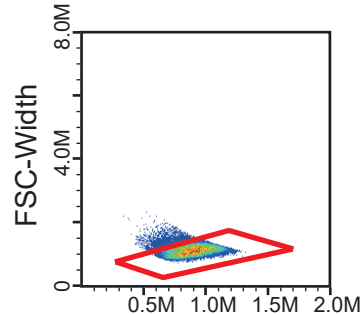

Single cell

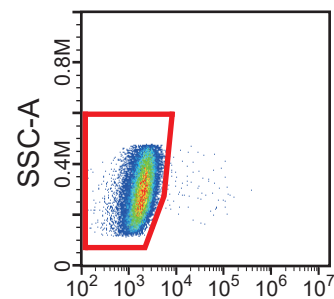

Live cell

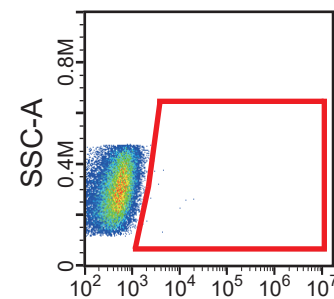

121-121

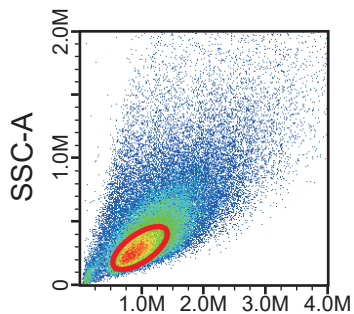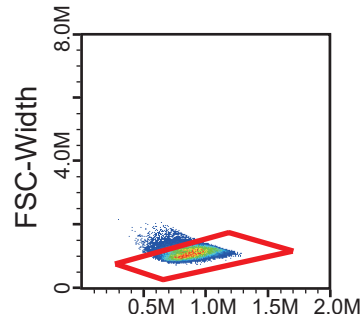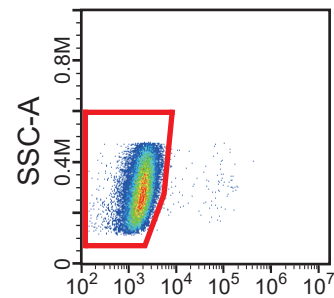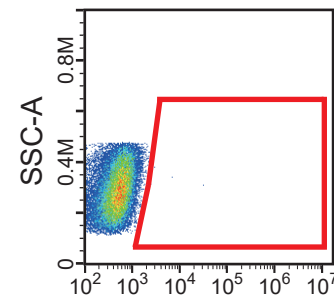

Zeocin (+)

121-IE2

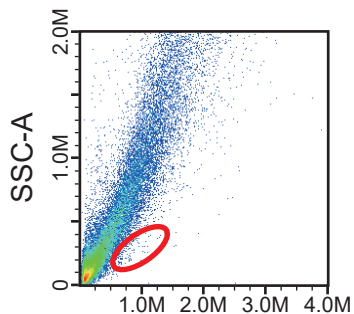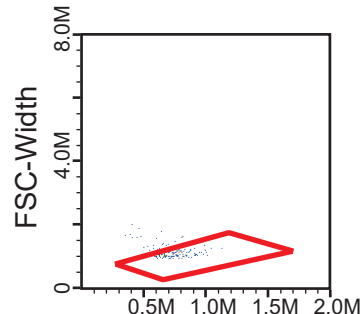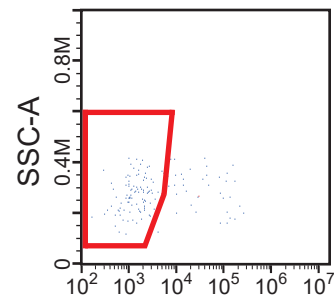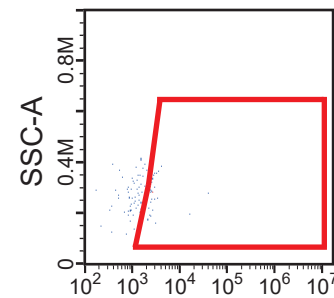

121-121

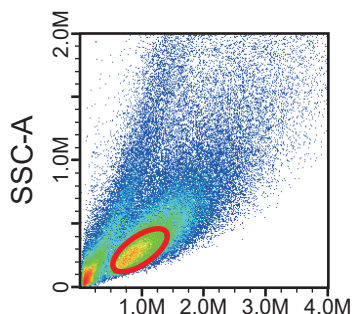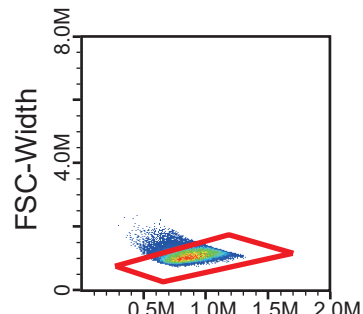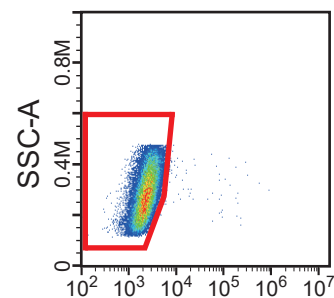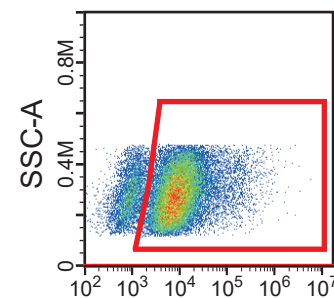

## **Figure S6**

Gating hierarchy and dot-plot images of transformed SaPe-4 cells in flow cytometry experiments.

Representative dot-plot images of the experimental groups are shown, and all gates are colored red. The gating hierarchy is main population (left panels) - single cell (doublet discrimination, left middle panels) - live cell (right middle panels) - GFP<sup>+</sup> cell (right panels). Most 121-IE2-transfected cells died after zeocin selection (middle lower panels), while most live cells were AcGFP1-positive in the 121-121-transfected group (lower panels).

**a**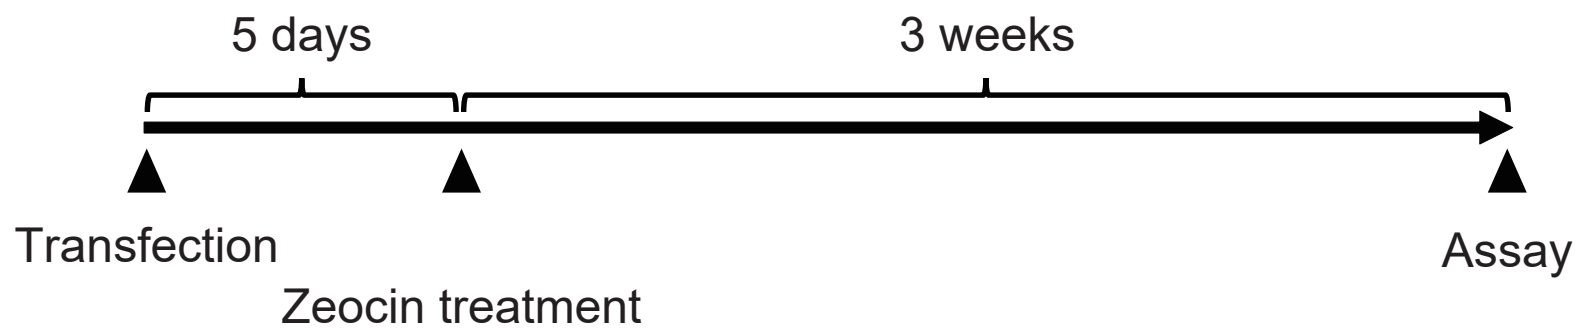**b**% of AcGFP1<sup>+</sup> Sf9 cells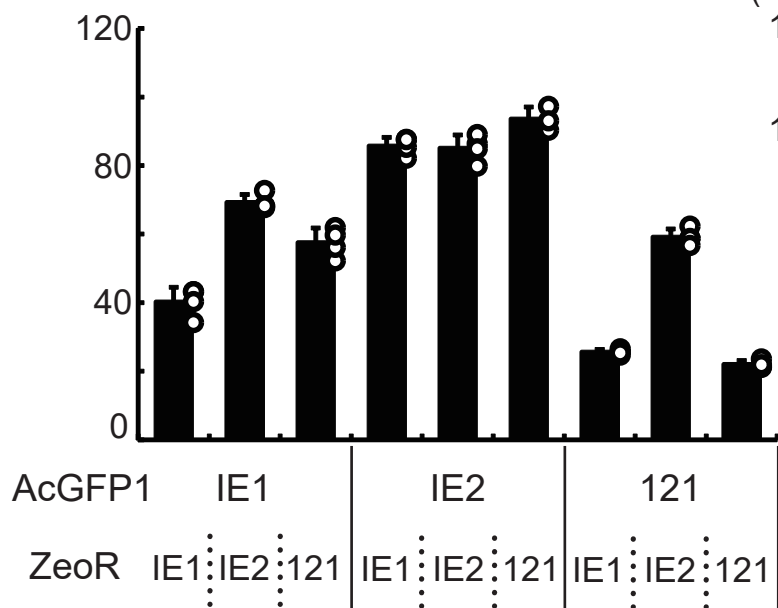**c**MFI of AcGFP1<sup>+</sup> Sf9 cells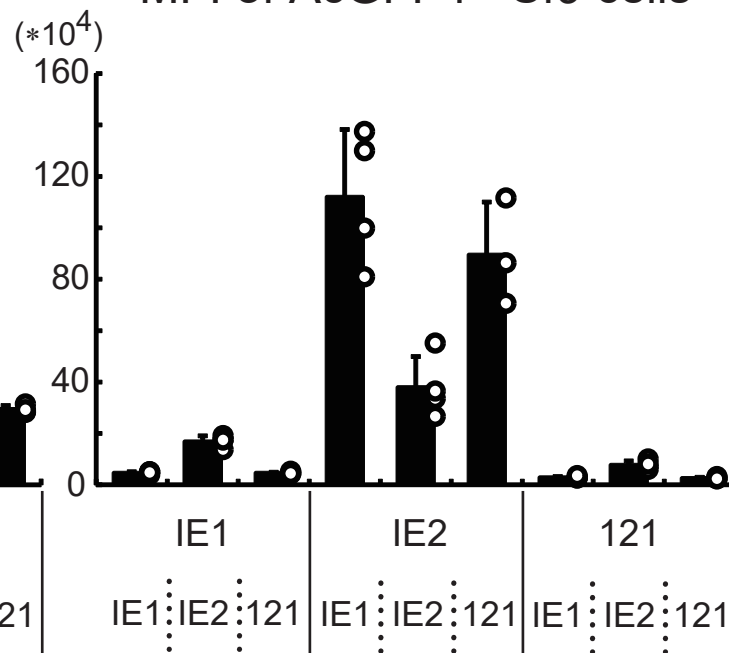**d**

Luciferase activity

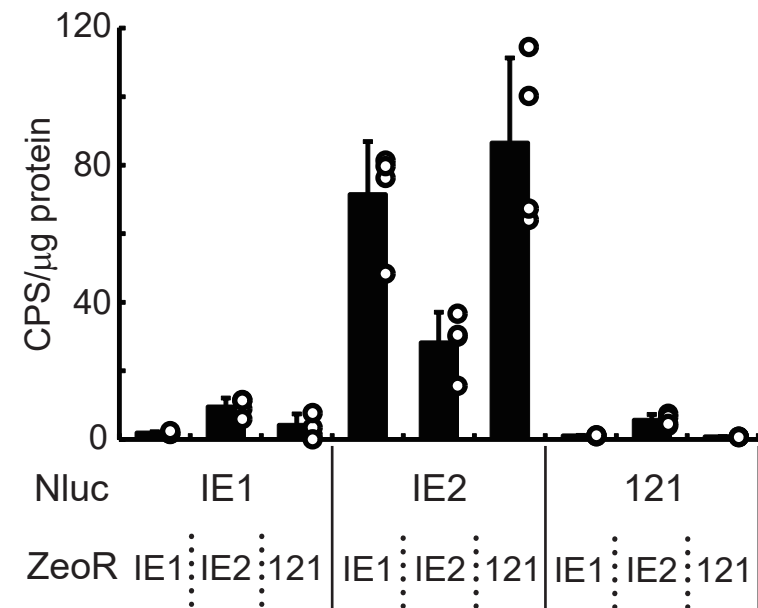

## **Figure S7**

Use of the 121 promoter for the establishment of stably transfected Sf9 cells.

The experimental scheme is shown in (a). Nine plasmid vectors for the expression of AcGFP1/Nluc and ZeoR were transfected into Sf9 cells. After zeocin selection, the cells were assessed for AcGFP1 fluorescence or luciferase activity. In the AcGFP1-expressing cells, the proportions and MFIs of GFP<sup>+</sup> cells in the live cell population were analyzed by a CytoFLEX S flow cytometer (b and c). In the Nluc-expressing cells, the luciferase activities were measured (d). The values are expressed as mean  $\pm$  SD; n=3-4 in each group. Statistical analysis is presented on Tables S1-S4.

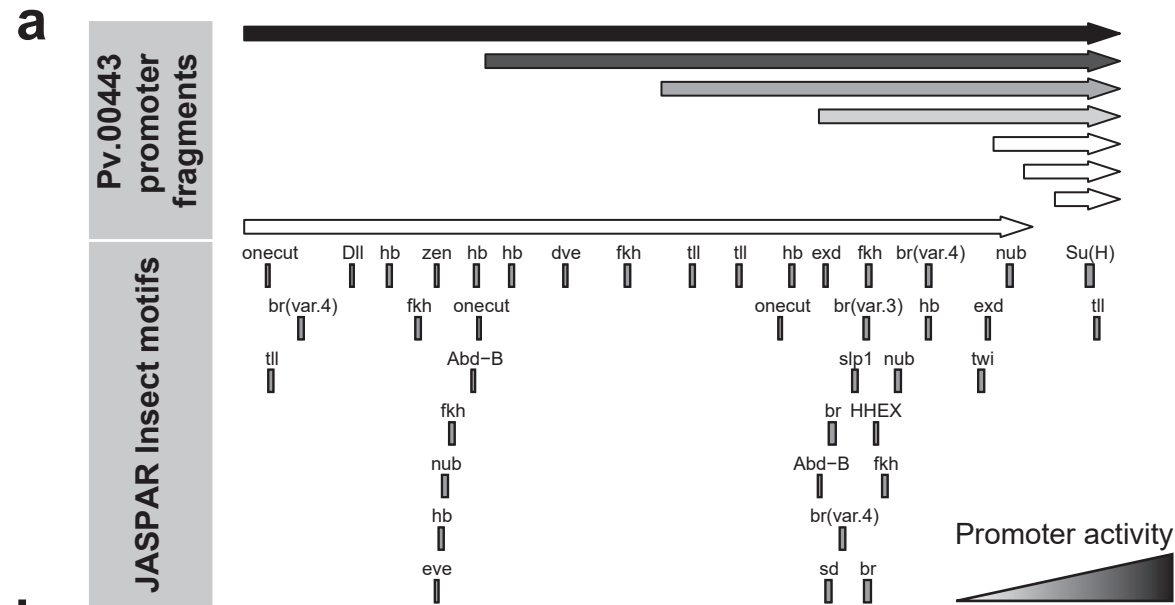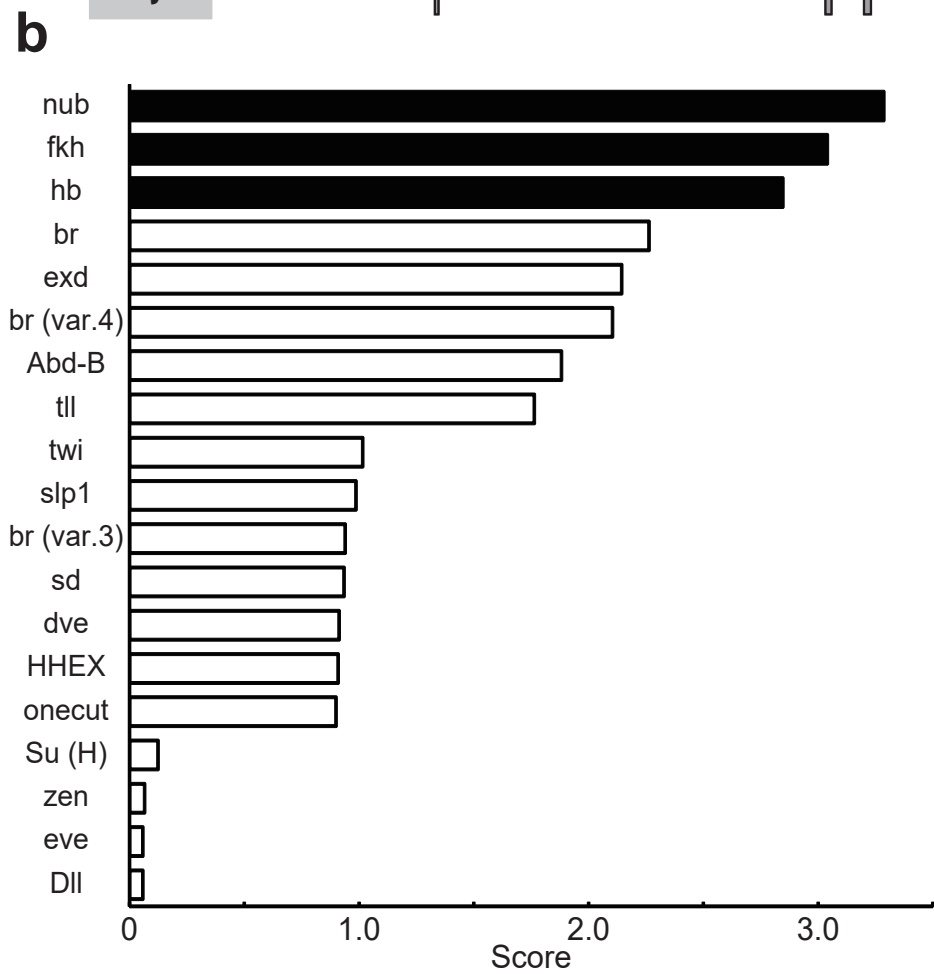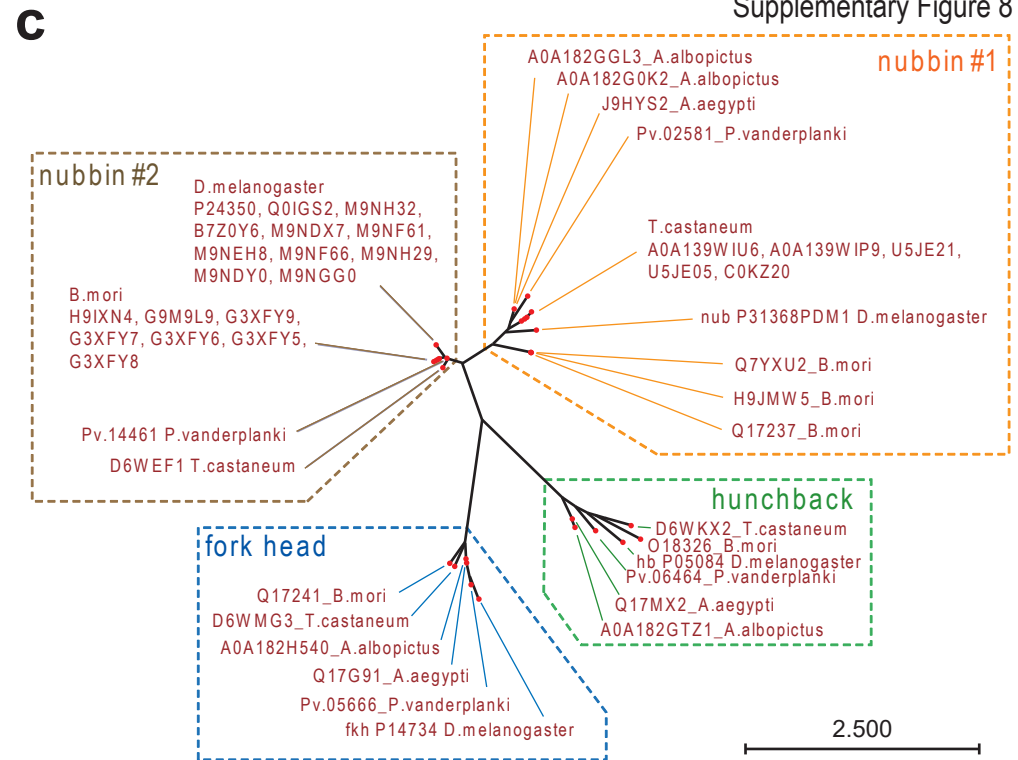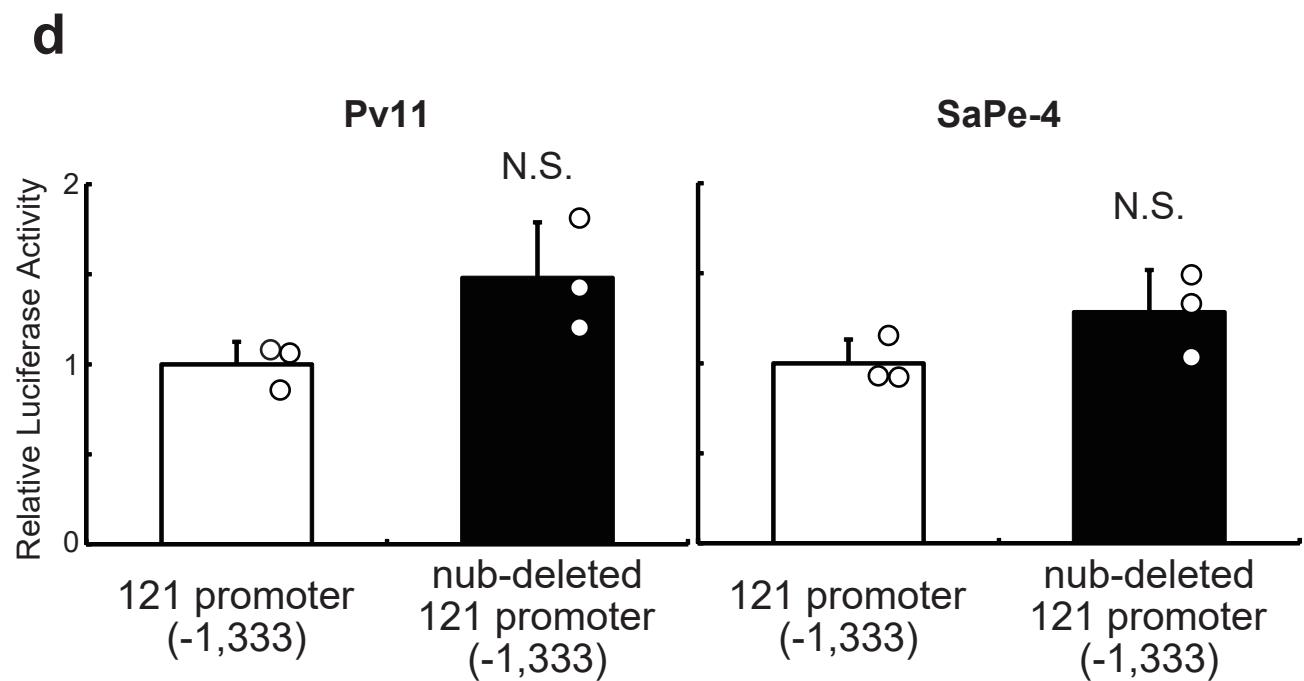



## Figure S8

Analysis of known motif sequences in the 121 promoter.

Known insect TFBS motifs in the 121 promoter sequence were annotated (a). The impact of predicted TFBSs on 121 promoter activity was calculated as follows:  $\text{Score} = \sum_i^L \text{Act}(i) * I$ , where L - number of fragment, I - motif similarity score, Act - difference of activity between neighbor sequences normalized to the length of removed fragment (b). Phylogenetic comparison of the top three transcription factors for *D. melanogaster*, *B. mori*, *T. castaneum*, *P. vanderplanki*, *A. albopictus* and *Aedes aegypti* revealed two distinct types of nubbin molecule for these insects (c). The relative activities of the 121 promoters with or without the nubbin #2 binding motif were measured in Pv11 and Sape-4 cells (d). Normalized values are expressed as mean  $\pm$  SD; N.S., not significant; n=3 in each group.

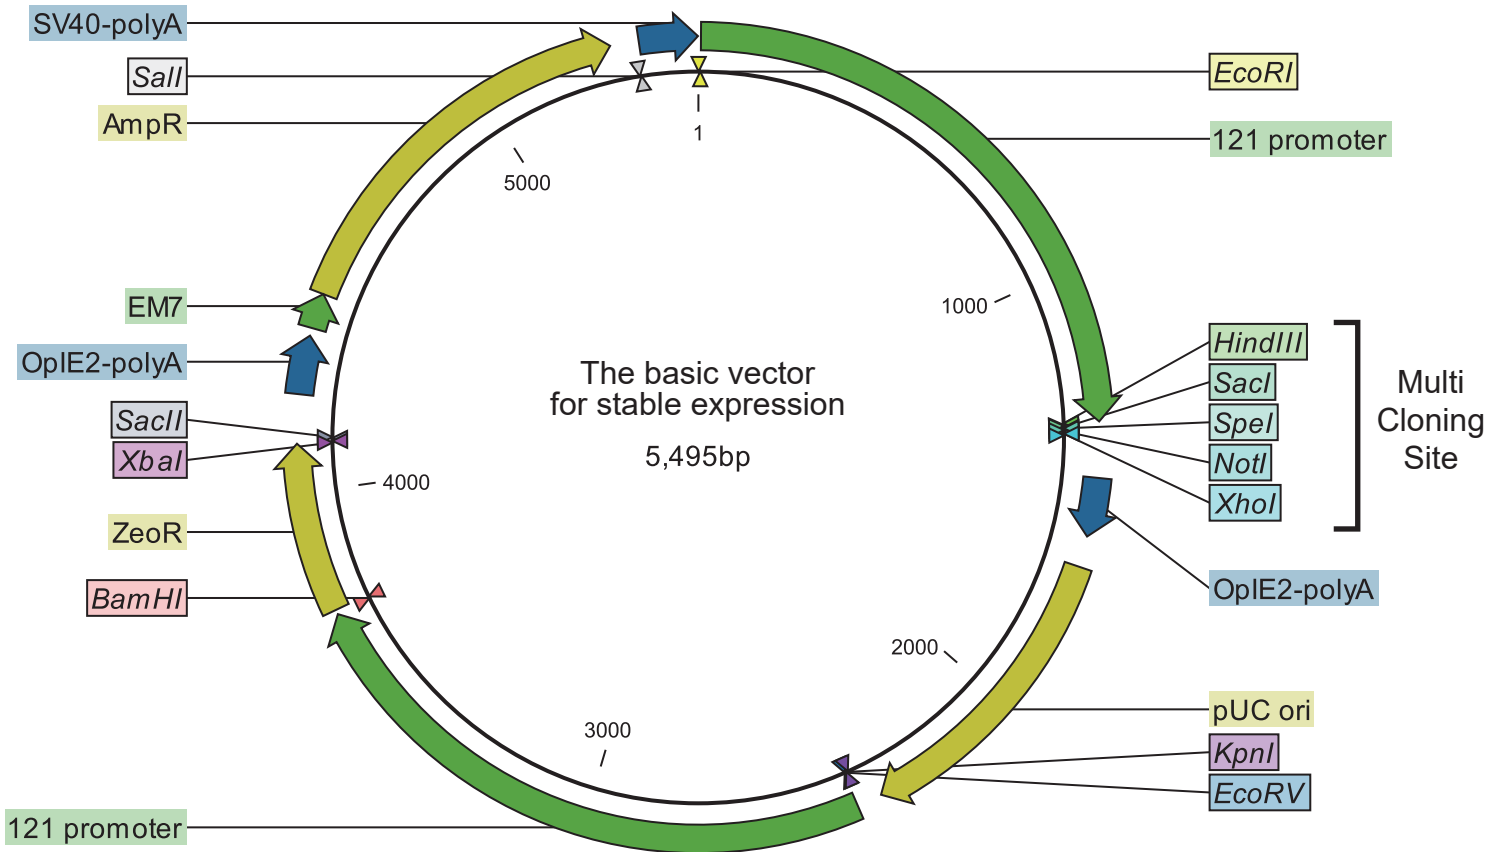

## **Figure S9**

The map of the basic vector for stable expression.

The multi-cloning site of the vector includes *Hind*III, *Sac*I, *Spe*I, *Not*I and *Xho*I sites.

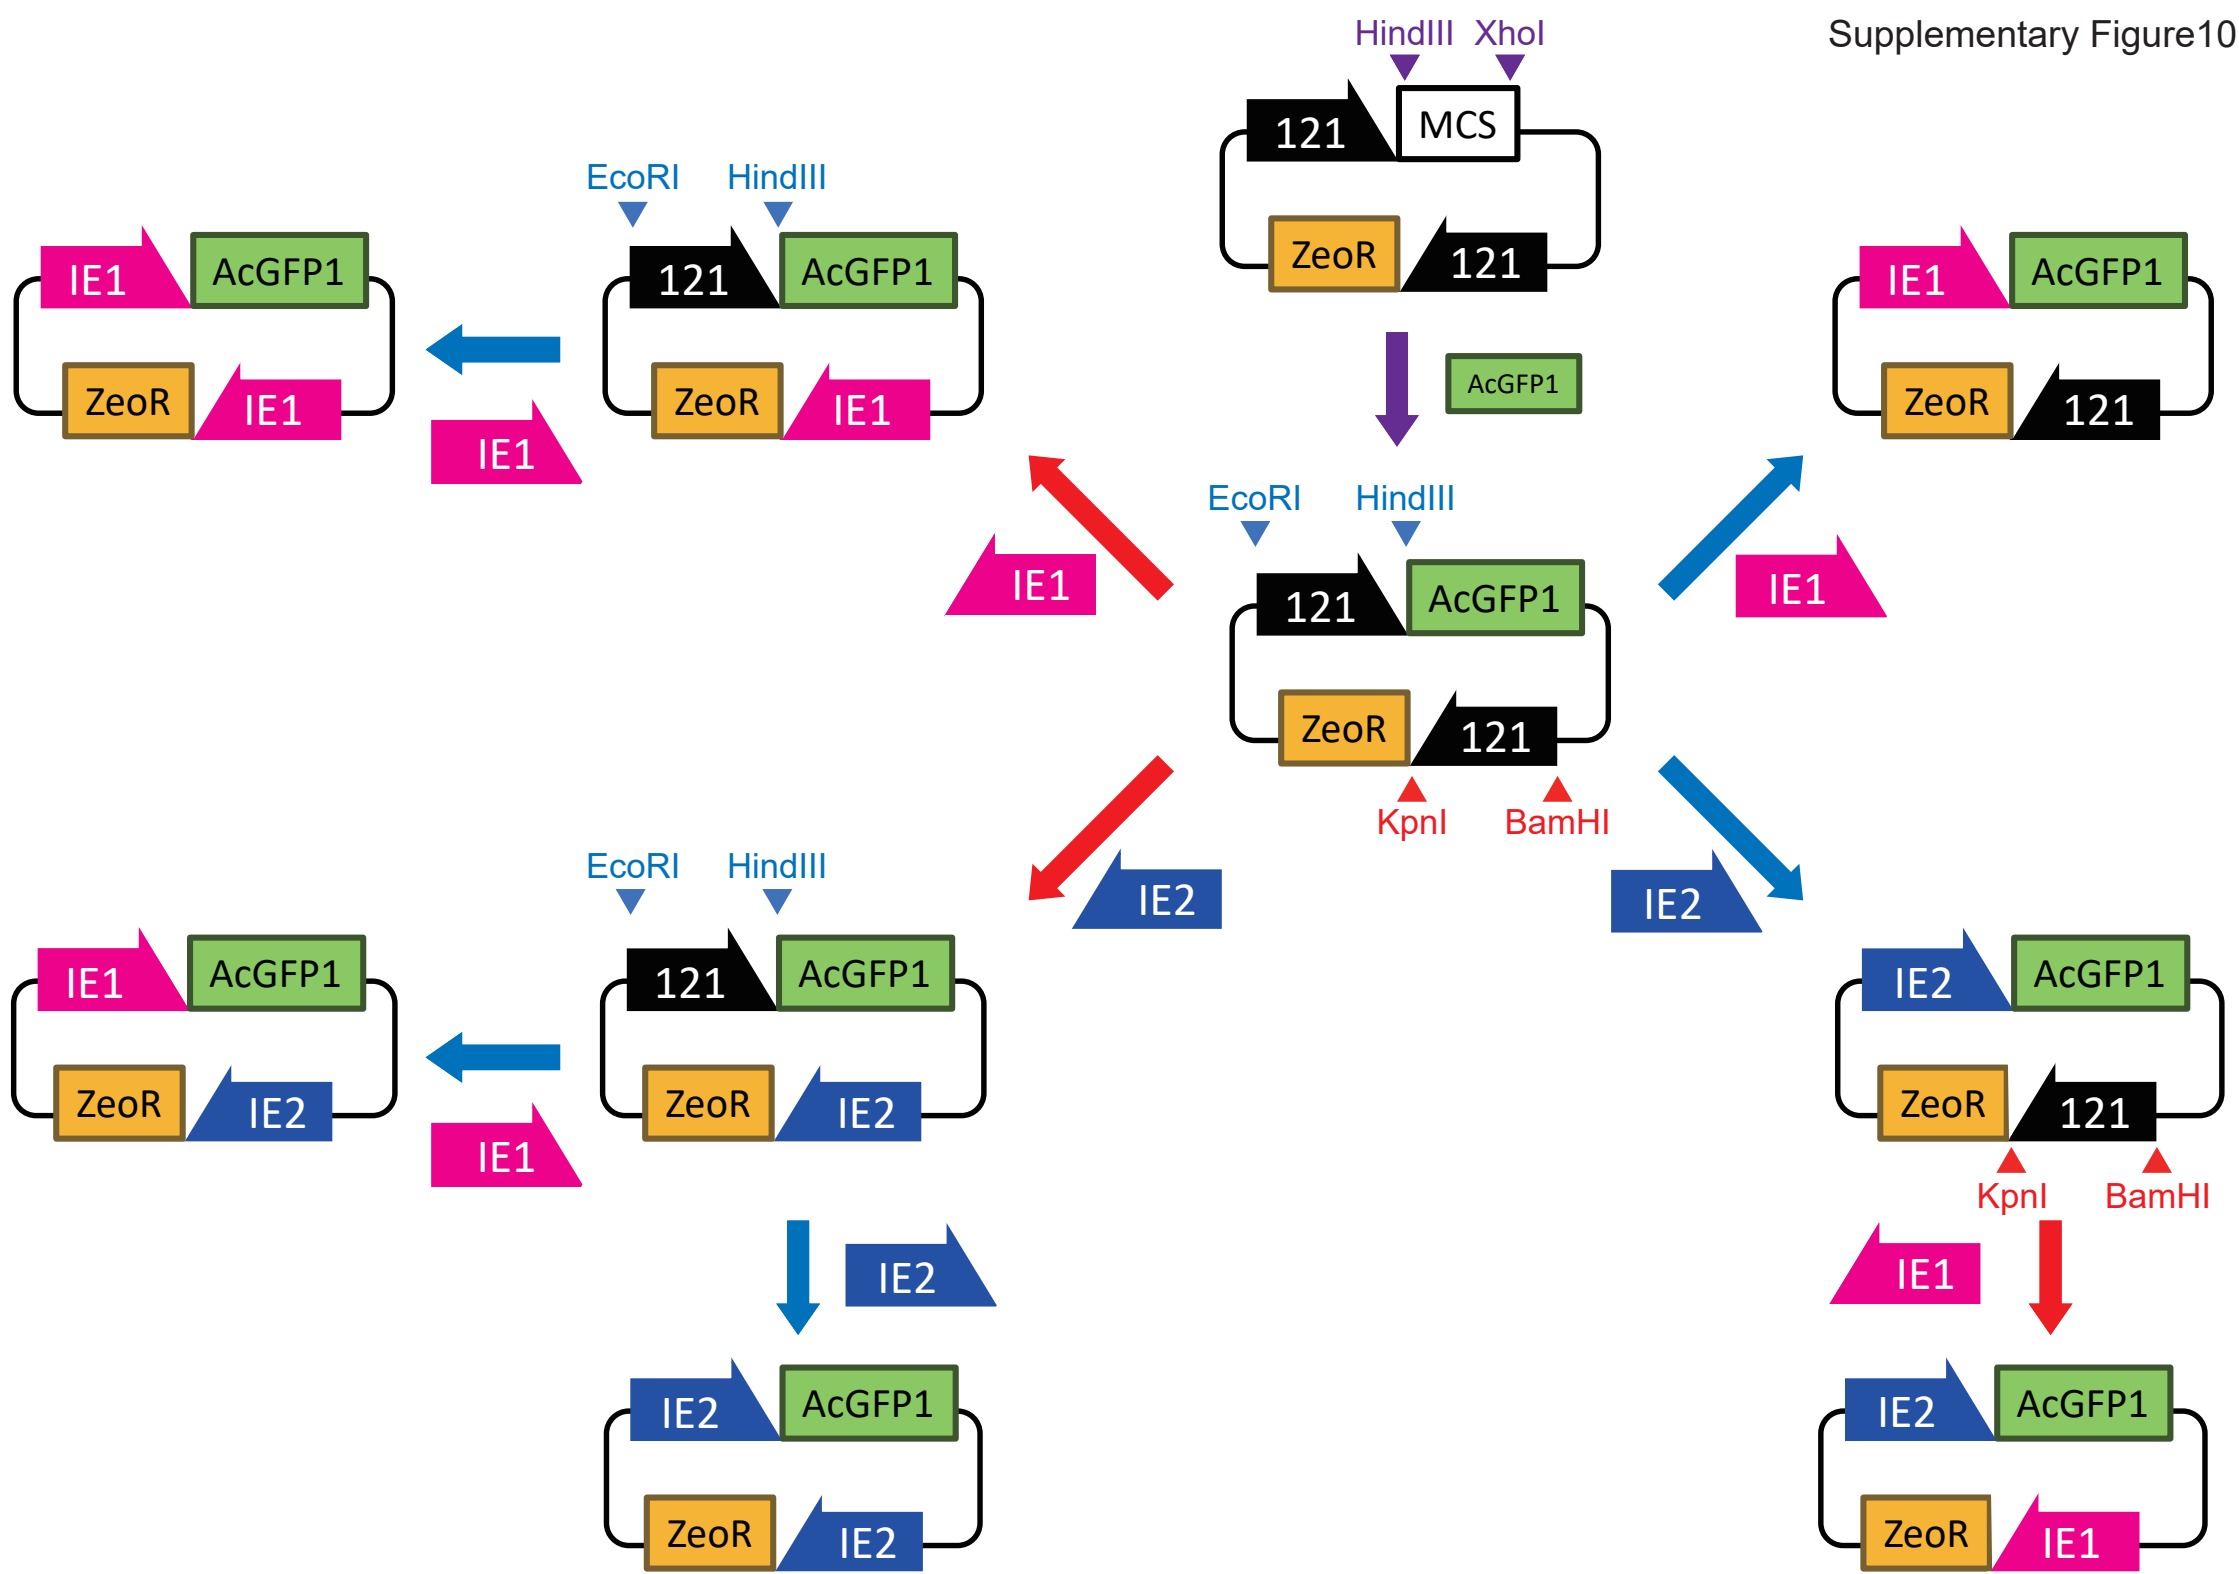

## Figure S10

Vector construction scheme for stable expression of AcGFP1.

The basic vector was digested with *Hind*III and *Xho*I, and a PCR fragment of the AcGFP1 gene was ligated by HiFi assembly. Then, the vector was digested with *Eco*RI and *Hind*III, or *Kpn*I and *Bam*HI, and a PCR fragment of the OpIE1 or OpIE2 promoter was ligated by HiFi assembly.

**Supplementary Table 1: Two-way ANOVA in Figures S7b-d.**

| Cell | Data Source<br>(Dependent Variable)  | Source of Variation | % of total variation | <i>p</i> -value |
|------|--------------------------------------|---------------------|----------------------|-----------------|
| Sf9  | Figure S7b<br>(% of AcGFP1+ cells)   | Interaction         | 12.01                | <0.0001         |
|      |                                      | AcGFP1              | 74.94                | <0.0001         |
|      |                                      | ZeoR                | 12.43                | <0.0001         |
|      | Figure S7c<br>(MFI of AcGFP1+ cells) | Interaction         | 17.72                | <0.0001         |
|      |                                      | AcGFP1              | 72.93                | <0.0001         |
|      |                                      | ZeoR                | 3.997                | 0.0016          |
|      | Figure S7d<br>(Luciferase activity)  | Interaction         | 15.73                | <0.0001         |
|      |                                      | Nluc                | 72.02                | <0.0001         |
|      |                                      | ZeoR                | 4.097                | 0.0039          |

**Supplementary Table 2: Statistical analysis of percentages of AcGFP1<sup>+</sup> Sf9 cells in**

**Figure S7b.**

|             | IE1-<br>IE1 | IE1-<br>IE2 | IE1-<br>121 | IE2-<br>IE1 | IE2-<br>IE2 | IE2-<br>121 | 121-<br>IE1 | 121-<br>IE2 | 121-<br>121 |
|-------------|-------------|-------------|-------------|-------------|-------------|-------------|-------------|-------------|-------------|
| IE1-<br>IE1 |             | ***         | ***         | ***         | ***         | ***         | ***         | ***         | ***         |
| IE1-<br>IE2 | -           |             | ***         | ***         | ***         | ***         | ***         | **          | ***         |
| IE1-<br>121 | -           | -           |             | ***         | ***         | ***         | ***         | ns          | ***         |
| IE2-<br>IE1 | -           | -           | -           |             | ns          | *           | ***         | ***         | ***         |
| IE2-<br>IE2 | -           | -           | -           | -           |             | *           | ***         | ***         | ***         |
| IE2-<br>121 | -           | -           | -           | -           | -           |             | ***         | ***         | ***         |
| 121-<br>IE1 | -           | -           | -           | -           | -           | -           |             | ***         | ns          |
| 121-<br>IE2 | -           | -           | -           | -           | -           | -           | -           |             | ***         |
| 121-<br>121 | -           | -           | -           | -           | -           | -           | -           | -           |             |

Statistical analysis was performed by Tukey test as a post-hoc test for two-way ANOVA.

\*  $p < 0.05$ ; \*\*  $p < 0.01$ ; \*\*\*  $p < 0.001$ ; ns, not significant.

**Supplementary Table 3: Statistical analysis of MFIs of AcGFP1<sup>+</sup> Sf9 cells in Figure**

**S7c.**

|             | IE1-<br>IE1 | IE1-<br>IE2 | IE1-<br>121 | IE2-<br>IE1 | IE2-<br>IE2 | IE2-<br>121 | 121-<br>IE1 | 121-<br>IE2 | 121-<br>121 |
|-------------|-------------|-------------|-------------|-------------|-------------|-------------|-------------|-------------|-------------|
| IE1-<br>IE1 |             | ns          | ns          | ***         | **          | ***         | ns          | ns          | ns          |
| IE1-<br>IE2 | -           |             | ns          | ***         | ns          | ***         | ns          | ns          | ns          |
| IE1-<br>121 | -           | -           |             | ***         | **          | ***         | ns          | ns          | ns          |
| IE2-<br>IE1 | -           | -           | -           |             | ***         | ns          | ***         | ***         | ***         |
| IE2-<br>IE2 | -           | -           | -           | -           |             | ***         | **          | *           | **          |
| IE2-<br>121 | -           | -           | -           | -           | -           |             | ***         | ***         | ***         |
| 121-<br>IE1 | -           | -           | -           | -           | -           | -           |             | ns          | ns          |
| 121-<br>IE2 | -           | -           | -           | -           | -           | -           | -           |             | ns          |
| 121-<br>121 | -           | -           | -           | -           | -           | -           | -           | -           |             |

Statistical analysis was performed by Tukey test as a post-hoc test for two-way ANOVA.

\*  $p < 0.05$ ; \*\*  $p < 0.01$ ; \*\*\*  $p < 0.001$ ; ns, not significant.



**Supplementary Table 4: Statistical analysis of luciferase activities of AcGFP1<sup>+</sup> Sf9**

**cells in Figure S7d.**

|             | IE1-<br>IE1 | IE1-<br>IE2 | IE1-<br>121 | IE2-<br>IE1 | IE2-<br>IE2 | IE2-<br>121 | 121-<br>IE1 | 121-<br>IE2 | 121-<br>121 |
|-------------|-------------|-------------|-------------|-------------|-------------|-------------|-------------|-------------|-------------|
| IE1-<br>IE1 |             | ns          | ns          | ***         | *           | ***         | ns          | ns          | ns          |
| IE1-<br>IE2 | -           |             | ns          | ***         | ns          | ***         | ns          | ns          | ns          |
| IE1-<br>121 | -           | -           |             | ***         | ns          | ***         | ns          | ns          | ns          |
| IE2-<br>IE1 | -           | -           | -           |             | ***         | ns          | ***         | ***         | ***         |
| IE2-<br>IE2 | -           | -           | -           | -           |             | ***         | *           | ns          | *           |
| IE2-<br>121 | -           | -           | -           | -           | -           |             | ***         | ***         | ***         |
| 121-<br>IE1 | -           | -           | -           | -           | -           | -           |             | ns          | ns          |
| 121-<br>IE2 | -           | -           | -           | -           | -           | -           | -           |             | ns          |
| 121-<br>121 | -           | -           | -           | -           | -           | -           | -           | -           |             |

Statistical analysis was performed by Tukey test as a post-hoc test for two-way ANOVA.

\*  $p < 0.05$ ; \*\*  $p < 0.01$ ; \*\*\*  $p < 0.001$ ; ns, not significant.

**Supplementary Table 5: Predicted contribution of nubbin binding sites on the 121 promoter activity in Figure S8.**

| <b>motif number of JASPR</b> | <b>motif ID</b> | <b>input sequence</b> | <b>start</b> | <b>stop</b> | <b>strand</b> | <b>score</b> | <b>p-value</b> | <b>q-value</b> | <b>matched sequence</b> |
|------------------------------|-----------------|-----------------------|--------------|-------------|---------------|--------------|----------------|----------------|-------------------------|
| MA0197.2                     | nub             | 121 promoter          | 461          | 472         | -             | 16.2418      | 1.55E-06       | 0.00329        | TATGCAAATTAA            |
| MA0197.2                     | nub             | 121 promoter          | 226          | 237         | +             | 11.2418      | 5.69E-05       | 0.06           | TATTGAAATGAG            |
| MA0197.2                     | nub             | 121 promoter          | 1413         | 1424        | +             | 10.4725      | 8.45E-05       | 0.06           | AATTTAAATGAG            |

The most probable nubbin binding site was listed on the top of the table, and its impact on the 121 promoter activity was examined in Pv11 and SaPe-4 cells (Fig. S8d).

**Supplementary Table 6: Primers for the construction of the basic vector for stable expression in Figure S9.**

| PCR fragment            | forward primer (5'-3')                                                                                                                             | reverse primer (5'-3')                                                    |
|-------------------------|----------------------------------------------------------------------------------------------------------------------------------------------------|---------------------------------------------------------------------------|
| AmpR                    | CAAGCGCGTGCGAATTAATTCGGATCTCTG-<br>CAGCACGTGTTGACAATTAATCATCGGCAT-<br>AGTATATCGGCATAGTATAATACGACTCAC-<br>TATAGGAGGGCCACCATGAGTATTC AACAT-<br>TTCCG | TCGGCGTCGGTTACCAATGCTTAATCAGTG                                            |
| 121 promoter for GOI    | GCATTGGTAACCGACGCCGACCAACACC                                                                                                                       | CTAGTGAGCTCAAGCTTTTTTTTCAGAAAA-<br>TATTTCTTTTGTCCAACGATGTTATTGCT-<br>TTAG |
| 121 promoter for ZeoR   | GGGATTTGGGGTACCGATATCCTTCAATT-<br>ATGATACATGAATAAACAAAATATTAAG                                                                                     | GGCCATGTTGGGATCCTTTTTTCAGAAAAT-<br>ATTTCTTTTGTC                           |
| pUC ori                 | TCTGAAAAAAAAGCTTGAGCTCACTAGTGC-<br>GGCCGCTCGAGTTCGAAGGTAAGCCTATC                                                                                   | TGAAGGATATCGGTACCCCAAAATCCCTTA-<br>ACGTG                                  |
| ZeoR                    | TCTGAAAAAAGGATCCCAACATGGCCAAGT-<br>TGACCAGTG                                                                                                       | CGCGGGCCCTTAGATTAGTCCTGCTCCTC-<br>GGC                                     |
| poly(A) signal for ZeoR | GCAGGACTAATCTAGAGGGCCCGGTTCCG-<br>AAGGTAAGCCTATCCC                                                                                                 | GAGATCCGAATTAATTCGCACGCGCTTGAA-<br>AGGAGTG                                |

The primers were designed using the NEBuilder Assembly Tool Version1 (<https://nebuilderv1.neb.com/>).

### Supplementary Data 1

The 1,842 base sequence in Figure 1.

The region of the 121 promoter was shown in red. The highlighted region shows a putative nubbin binding motif (related to Fig. S8).

TCGTGAGTCAATTTAAAAATTACTTACTAATATTTGATAATTAATCTTGACTTTT  
TCTTCTTTTTTCTCACAAAGTGAATTGAATATGAAAGAAAATCGAGAAGATCTA  
TCTCTTTTTGGAGTTCGAAGCTGCAGTTGCATCGCATGCGTTCAGAATTTATC  
TTAAGTCACATAAATGATAAAAATATGATGCAAATGGCTAGAGTGTACAATT  
TTCATTTTGATACTATTGAAATGAGAAATATTTTCGCATGCAATGGAAATAATTT  
CAACACTATTTGACATTCTCAACAAGTGCGAAGAACCAATAGTTTTGGAAAT  
GCTTTTTTGCTGTAAAATTATCAAGGAAATATTCAACAGTCTCGTCGATCGCTT  
AATGTTTCCGATATAAAATTTAAAATTTTTACTGTGTAACATCTTATCTATTCC  
ATATTTTTTTGATTCATTTTCTCAACCACATATTTAATTTGCATAATTGTTATTAA  
ACTTTTGTTAACTACTAAAAAACTTCAATTATGATACATGAATAAACAAAA  
TATTAAAGAATAAAATTGTTTTTCTTCATTCATATTGAATTTTTATTATTATTTT  
GTAACTTTTGTCTTTTAAAAATTTCAAAGATATTTCATAAATTCATCTGAAAT  
TCTCAGATTTATAATGTAATGTTGAAAAAATCGTATTTATTTTTTTGCGTAAATG  
AAAGGGAAATTGATTTGCAATCCAAAAGAAGAATTTCTTTTACATTTTGTAT  
TTAAAGATACGCAAAAAAGAACACAAATTCATAATAATTTTCAAAGTCAACA  
GAAGTACATTGCTTCTATAAAAATTATTTAAAATTTAAAATTTGTGAAAAGAAT  
TTAAAATGTGTGGTAGAAATAAAAATCTTAATAAAAAGTCAGTGCGAGTGTC

GCATCATCATCATCATCATTTTTATATCAATGAACAGTTAATAGAACCTGAGGA  
AAAATCATCAAAATTCAAATGATTCAGCAAACCATCAATACATCACTATTTTTA  
CTTCAACGATAAGCAAATAAATAAAGAAGATTGTCAGCCGAATGTTGCTACA  
CTCGCGAAAAATACAGTAAAAGAACATTCATTCAACATCAAAAAGCTGCAT  
CTCAAGAAAAAAATTCAGGCTGCTATCACTTTGAACATAATCCAATTGATAAG  
AAATGGGCACAGTATTTTGAAGAGAGATTGGAAAATCACATGGACATCACC  
ATTATCATTCGTTCAATAATGATGATTTTCCAAAAATGTTTTTCAACAAAAAAT  
ATTTTGAAGGAAGTTTCCTTGATTAAGCAATTCATATATTTGAAAGAGAATTTT  
TGCATTTGATTTTTTTTTTCATAAAAATTAATTTGTCGTTTATAAAACATATTTGT  
CAGTATGTTTATTTTAAAAAATTAAATGAGTAAAAAACTAATGAAAACAT  
AAATAAGTGAATTTTTATTTCAATTTGTACAAACAATGATTATCATCATTATCTCA  
TCAATTTCACTACTTTTAGAGAATTTTCACAAAAAAAATTATTTTTCTACAGA  
AAAATCACAAAATAATGAAATCTTATCAATATAAAAAAATGCATGTCATTACCG  
GCAATTACTCATATACAAAACAAACAAGCACAAACACGTTCAAATCATATTT  
TCCTCACTATACAATATAATTATTGTACACATGCTCATTATTTACAAGAATTG  
TAAAGAATATTGTGAGTGTATGTGAAGCATATAAAAAGCAGATTAAATCGTAC  
AACATTCAGTTGACTTATGATTTCTAAACGAATAACATCGTTGGACAAAAGAA  
AATATTTTCTGAAAAAA

## Supplementary Data 2

Full length sequence of the basic vector for stable expression related to Figure S9.

The region of 121 promoter is shown in red.

GAATTCCTTCAATTATGATACATGAATAAACAAAATATTAAGAATAAAATTGT  
TTTTCTTCATTCATATTGAATTTTTATTATTATTTGTAACTTTGTCTTTTAA  
AAATTTCAAAGATATTCATAAATTCATCTGAAATTCTCAGATTTATAATGTAAT  
GTTGAAAAAATCGTATTTATTTTTTTCGTAATGAAAGGGAAATTGATTTCG  
CAATCCAAAAGAAGAATTTCTTTTACATTTTGTATTTAAAGATACGCAAAAAA  
GAACACAAATTCATAATAATTTCAAAGTCAACAGAAGTACATTGCTTCTATA  
AAAATTATTTAAAATTTAAAATTTGTGAAAAGAATTTAAAATGTGTGGTAGA  
AATAAAAATCTTAATAAAAAGTCAGTGCGAGTGTGAGCATCATCATCATCA  
TTTTTATATCAATGAACAGTTAATAGAACCTGAGGAAAAATCATCAAATTC  
AATGATTCAGCAAACCATCAATACATCACTATTTTTACTTCAACGATAAGCAA  
ATAAATAAAGAAGATTGTCAGCCGAATGTTGCTACACTCGCGAAAAATACAG  
TAAAAGAACATTTCAATCAACATCAAAAAGCTGCATCTCAAGAAAAAATTC  
AGGCTGCTATCACTTTGAACATAATCCAATTGATAAGAAATGGGCACAGTATT  
TTGAAGAGAGATTTGGAAAATCACATGGACATCACCATTATCATTTCGTTCAAT  
AATGATGATTTTCCAAAATGTTTTTCAACAAAAAATATTTTGAAGGAAGTTT  
CCTTGATTAAGCAATTCATATATTTGAAAGAGAATTTTTGCATTTGATTTTTTTT  
TCATAAAAATTAATTTGTCGTTTATAAACATATTTGTCAGTATGTTTATTTTAA  
AAAATTTAAATGAGTAAAAAACTAATGAAAACCTATAAATAAGTGAATTTTTTA

TTTCATTTGTACAAACAATGATTATCATCATTATCTCATCAATTCATCACTTTT  
AGAGAATTTTCACAAAAAAAATTATTTTTCTACAGAAAATCACAAAATAAT  
GAAATTCTTATCAATATAAAAAATGCATGTCATTACCGGCAATTACTCATATAC  
AAAACAAACAAGCACAAACACGTTCAAATCATATTTTCCTCACTATACAATA  
TAATTATTGTACACATGCTCATTATTTTACAAGAATTGTAAAGAATATTGTGA  
GTGTATGTGAAGCATATAAAAAGCAGATTAAATCGTACAACATTCAGTTGACT  
TATGATTTCTAAACGAATAACATCGTTGGACAAAAGAAAATATTTTCTGAAAA  
AAAGCTTGAGCTCACTAGTGCGGCCGCTCGAGTTCGAAGGTAAGCCTATCC  
CTAACCTCTCCTCGGTCTCGATTCTACGCGTACCGGTCATCATCACCATCAC  
CATTGAGTTTATCTGACTAAATCTTAGTTTGTATTGTCATGTTTTAATACAATAT  
GTTATGTTTAAATATGTTTTTAATAAATTTATAAAATAATTTCAACTTTTATTGT  
ACAACATTGTCCATTTACACACTCCTTTCAAGCGCGTGGGATCGATGCTCAC  
TCAAAGGCGGTAATACGGTTATCCACAGAATCAGGGGATAACGCAGGAAAGA  
ACATGTGAGCAAAGGCCAGCAAAGGCCAGGAACCGTAAAAAGGCCGCG  
TTGCTGGCGTTTTTCCATAGGCTCCGCCCCCTGACGAGCATCACAAAATCG  
ACGCTCAAGTCAGAGGTGGCGAAACCCGACAGGACTATAAAGATAACCAGGC  
GTTTCCCCCTGGAAGCTCCCTCGTGCGCTCTCCTGTTCCGACCCTGCCGCTTA  
CCGGATACCTGTCCGCCTTTCTCCCTTCGGGAAGCGTGGCGCTTTCTCATAGC  
TCACGCTGTAGGTATCTCAGTTCGGTGTAGGTCGTTTCGCTCCAAGCTGGGCTG  
TGTGCACGAACCCCCGTTTCAGCCCGACCGCTGCGCCTTATCCGGTAACTATC  
GTCTTGAGTCCAACCCGGTAAGACACGACTTATCGCCACTGGCAGCAGCCAC  
TGGTAACAGGATTAGCAGAGCGAGGTATGTAGGCGGTGCTACAGAGTTCTTG

AAGTGGTGGCCTAACTACGGCTACACTAGAAGAACAGTATTTGGTATCTGCG  
CTCTGCTGAAGCCAGTTACCTTCGGAAAAAGAGTTGGTAGCTCTTGATCCGG  
CAAACAAACCACCGCTGGTAGCGGTGGTTTTTTTTGTTTGCAAGCAGCAGATT  
ACGCGCAGAAAAAAGGATCTCAAGAAGATCCTTTGATCTTTTCTACGGGGT  
CTGACGCTCAGTGGAACGAAAACCTCACGTAAAGGGATTTTGGGGTACCGATA  
TCCTTCAATTATGATACATGAATAAACAAAATATTAAGAATAAAATTGTTTTT  
CTTCATTCATATTGAATTTTTATTATTATTTTGTTAACTTTTGTCTTTAAAAAT  
TTCAAAGATATTCATAAATTCATCTGAAATTCTCAGATTTATAATGTAATGTTG  
AAAAATCGTATTTATTTTTTTGCGTAAATGAAAGGGAAATTGATTCGCAAT  
CCAAAAGAAGAATTTCTTTTACATTTTGTATTTAAAGATACGCAAAAAAGAAC  
ACAAATTCATAATAATTTTCAAAGTCAACAGAAGTACATTGCTTCTATAAAAA  
TTATTTAAAATTTAAAATTTGTGAAAAGAATTTTAAAATGTGTGGTAGAAATA  
AAAATCTTAATAAAAAGTCAGTGCGAGTGTCAGCATCATCATCATCATTTTTT  
ATATCAATGAACAGTTAATAGAACCTGAGGAAAAATCATCAAAATTCAAATGA  
TTCAGCAAACCATCAATACATCACTATTTTTACTTCAACGATAAGCAAATAAAT  
AAAGAAGATTGTCAGCCGAATGTTGCTACACTCGCGAAAAATACAGTAAAAG  
AACATTTCAATCAACATCAAAAAGCTGCATCTCAAGAAAAAATTCAGGCTG  
CTATCACTTTGAACATAATCCAATTGATAAGAAATGGGCACAGTATTTTGAAG  
AGAGATTTGGAAAATCACATGGACATCACCATTATCATTTCGTTCAATAATGAT  
GATTTTCCAAAATGTTTTTCAACAAAAAATATTTTGAAGGAAGTTTCCTTGA  
TTAAGCAATTCATATATTTGAAAGAGAATTTTGCATTTGATTTTTTTTTTCATAA  
AAATTAATTTGTCGTTTATAAAACATATTTGTCAGTATGTTTATTTTAAAAAATT



TAAATGAGTAAAAAACTAATGAAAAC TATAAATAAGTGAATTTTTATTTCATT  
TGTACAAACAATGATTATCATCATTATCTCATCAATTTTCATCACTTTTAGAGAAT  
TTTCACAAAAAAAATTATTTTTCTACAGAAAAATCACAAAATAATGAAATTC  
TTATCAATATAAAAAATGCATGTCATTACCGGCAATTACTCATATACAAAACAA  
ACAAGCACAAACACGTTCAAATCATATTTTCCTCACTATACAATATAATTATT  
GTACACATGCTCATTTATTTACAAGAATTGTAAAGAATATTGTGAGTGTATGT  
GAAGCATATAAAAAGCAGATTAAATCGTACAACATTCAGTTGACTTATGATTT  
CTAAACGAATAACATCGTTGGACAAAAGAAAATATTTTCTGAAAAAaggatccca  
acATGGCCAAGTTGACCAGTGCCGTTCCGGTGCTCACCGCGCGCGACGTCGC  
CGGAGCGGTTCGAGTTCTGGACCGACCGGCTCGGGTTCTCCCGGGACTTCGT  
GGAGGACGACTTCGCCGGTGTGGTCCGGGACGACGTGACCCTGTTTCATCAG  
CGCGGTCCAGGACCAGGTGGTGCCGGACAACACCCTGGCCTGGGTGTGGGT  
GCGCGGCCTGGACGAGCTGTACGCCGAGTGGTCCGGAGGTCGTGTCCACGAA  
CTTCCGGGACGCCTCCGGGCCGGCCATGACCGAGATCGGCGAGCAGCCGTG  
GGGGCGGGAGTTCGCCCTGCGCGACCCGGCCGGCAACTGCGTGC ACTTCGT  
GGCCGAGGAGCAGGACTAAAtctagaGGGCCCGCGGTTTCGAAGGTAAGCCTATCC  
CTAACCCCTCTCCTCGGTCTCGATTCTACGCGTACCGGTCATCATCACCATCAC  
CATTGAGTTTATCTGACTAAATCTTAGTTTGTATTGTCATGTTTTAATACAATAT  
GTTATGTTTAAATATGTTTTTAATAAATTTTATAAATAATTTCAACTTTTATTGT  
AACAAACATTGTCCATTTACACACTCCTTTCAAGCGCGTGCGAATTAATTCGGA  
TCTCTGCAGCACGTGTTGACAATTAATCATCGGCATAGTATATCGGCATAGTAT  
AATACGACTCACTATAGGAGGGCCACCATGAGTATTCAACATTTCCGTGTTCGC

CCTTATTCCCTTTTTTGCGGCATTTTGCCTTCCTGTTTTTGTCTACCCAGAAAC  
GCTGGTGAAAGTAAAAGATGCTGAAGATCAGTTGGGTGCACGAGTGGGTTA  
CATCGAACTGGATCTCAACAGCGGTAAGATCCTTGAGAGTTTTTCGCCCGAA  
GAACGTTTTCCAATGATGAGCACTTTTAAAGTTCTGCTATGTGGCGCGGTATT  
ATCCCGTATTGACGCCGGGCAAGAGCAACTCGGTCCCGCATACTATTCTC  
AGAATGACTTGGTTGAGTACTCACCAGTCACAGAAAAGCATCTTACGGATGG  
CATGACAGTAAGAGAATTATGCAGTGCTGCCATAACCATGAGTGATAAACTG  
CGGCCAACTTACTTCTGACAACGATCGGAGGACCGAAGGAGCTAACCGCTTT  
TTTGCACAACATGGGGGATCATGTAACCTCGCCTTGATCGTTGGGAACCGGAG  
CTGAATGAAGCCATACCAAACGACGAGCGTGACACCACGATGCCTGTAGCA  
ATGGCAACAACGTTGCGCAAACCTATTAACCTGGCGAACTACTTACTCTAGCTTC  
CCGGCAACAATTAATAGACTGGATGGAGGCGGATAAAGTTGCAGGACCACTT  
CTGCGCTCGGCCCTTCCGGCTGGCTGGTTTATTGCTGATAAATCTGGAGCCGG  
TGAGCGTGGGTCTCGCGGTATCATTGCAGCACTGGGGCCAGATGGTAAGCCC  
TCCCGTATCGTAGTTATCTACACGACGGGGAGTCAGGCAACTATGGATGAACG  
AAATAGACAGATCGCTGAGATAGGTGCCTCACTGATTAAGCATTGGTAACCG  
ACGCCGACCAACACCGCCGGTCCGACGGCGGCCACGGGTCCCAGGGGGGT  
CGACCTCGAAACTTGTTTATTGCAGCTTATAATGGTTACAAATAAAGCAATAG  
CATCACAAATTCACAAATAAAGCATTTTTTTTCACTGCATTCTAGTTGTGGTTT  
GTCCAAACTCATCAATGTATCTTATCATGTCT
